# Supplementary material for: Lactobacillus paracaseiameliorates cognitive impairment in high-fat induced obese miceviainsulin signaling and neuroinflammation pathways
Source: Royal Society of Chemistry journal article supplement (doi:10.1039/d1fo01320c), 2021-01-01

| Group            |            | Weight (g) |       |       |       |       |       |       |       |       |       |       |       |
|------------------|------------|------------|-------|-------|-------|-------|-------|-------|-------|-------|-------|-------|-------|
| Initial weight   | Control    | 28.10      | 28.51 | 28.46 | 28.52 | 28.57 | 28.97 | 28.67 | 28.11 | 28.14 | 28.60 | 28.78 | 28.25 |
|                  | HFD        | 28.10      | 28.40 | 28.39 | 28.55 | 28.09 | 28.18 | 28.27 | 28.75 | 28.48 | 28.04 | 28.17 | 28.67 |
|                  | HFD+Jlus66 | 28.54      | 28.96 | 28.99 | 28.70 | 28.46 | 28.75 | 28.66 | 28.90 | 28.87 | 28.23 | 28.72 | 28.48 |
| Final weight     | Control    | 34.57      | 34.94 | 34.97 | 34.94 | 35.02 | 35.46 | 35.09 | 34.54 | 34.67 | 35.06 | 35.21 | 34.65 |
|                  | HFD        | 44.95      | 45.20 | 45.28 | 45.40 | 44.92 | 44.99 | 45.11 | 45.66 | 45.38 | 44.92 | 44.99 | 45.52 |
|                  | HFD+Jlus66 | 10.83      | 41.21 | 41.32 | 41.06 | 40.71 | 41.03 | 40.92 | 41.17 | 41.10 | 40.49 | 41.02 | 40.72 |
| Body weight gain | Control    | 6.47       | 6.43  | 6.51  | 6.42  | 6.45  | 6.49  | 6.42  | 6.43  | 6.53  | 6.46  | 6.43  | 6.40  |
|                  | HFD        | 16.85      | 16.80 | 16.89 | 16.85 | 16.83 | 16.81 | 16.84 | 16.91 | 16.90 | 16.88 | 16.82 | 16.85 |
|                  | HFD+Jlus66 | 12.29      | 12.25 | 12.33 | 12.36 | 12.25 | 12.28 | 12.26 | 12.27 | 12.23 | 12.26 | 12.30 | 12.24 |

| Group |            | Plasma lipid content (mM) |      |      |      |      |      |      |      |      |      |      |      |
|-------|------------|---------------------------|------|------|------|------|------|------|------|------|------|------|------|
| TC    | Control    | 2.92                      | 3.00 | 2.92 | 2.94 | 2.98 | 2.89 | 2.91 | 2.85 | 3.01 | 2.99 | 2.95 | 2.96 |
|       | HFD        | 3.94                      | 4.21 | 3.85 | 3.97 | 3.89 | 3.96 | 3.98 | 4.01 | 4.05 | 4.11 | 4.06 | 3.99 |
|       | HFD+Jlus66 | 3.63                      | 3.10 | 3.72 | 3.49 | 3.51 | 3.44 | 3.50 | 3.53 | 3.51 | 3.46 | 3.47 | 3.48 |
| TG    | Control    | 0.31                      | 0.37 | 0.36 | 0.34 | 0.35 | 0.31 | 0.35 | 0.39 | 0.37 | 0.35 | 0.36 | 0.32 |
|       | HFD        | 0.57                      | 0.78 | 0.87 | 0.73 | 0.78 | 0.76 | 0.71 | 0.73 | 0.79 | 0.71 | 0.78 | 0.72 |
|       | HFD+Jlus66 | 0.34                      | 0.37 | 0.41 | 0.36 | 0.39 | 0.38 | 0.36 | 0.39 | 0.40 | 0.35 | 0.36 | 0.35 |
| HDL-C | Control    | 3.54                      | 3.57 | 3.68 | 3.58 | 3.62 | 3.59 | 3.60 | 3.62 | 3.57 | 3.62 | 3.63 | 3.57 |
|       | HFD        | 2.36                      | 2.01 | 2.59 | 2.31 | 2.32 | 2.36 | 2.29 | 2.26 | 2.35 | 2.31 | 2.34 | 2.27 |
|       | HFD+Jlus66 | 3.16                      | 3.18 | 3.26 | 3.10 | 3.30 | 3.40 | 3.20 | 3.09 | 3.20 | 3.19 | 3.23 | 3.27 |
| LDL-C | Control    | 0.33                      | 0.35 | 0.43 | 0.36 | 0.35 | 0.39 | 0.37 | 0.35 | 0.34 | 0.40 | 0.38 | 0.39 |
|       | HFD        | 0.51                      | 0.92 | 0.85 | 0.78 | 0.76 | 0.75 | 0.80 | 0.74 | 0.73 | 0.82 | 0.73 | 0.74 |
|       | HFD+Jlus66 | 0.53                      | 0.59 | 0.60 | 0.59 | 0.56 | 0.55 | 0.61 | 0.54 | 0.58 | 0.59 | 0.54 | 0.61 |

| Group |            | Escape Latency (s) |       |       |       |       |       |       |       |       |       |       |       |
|-------|------------|--------------------|-------|-------|-------|-------|-------|-------|-------|-------|-------|-------|-------|
| Day1  | Control    | 60.00              | 48.35 | 47.33 | 42.84 | 52.09 | 39.96 | 39.30 | 52.66 | 57.94 | 39.90 | 28.39 | 47.86 |
|       | HFD        | 60.00              | 60.00 | 60.00 | 60.00 | 60.00 | 60.00 | 60.00 | 60.00 | 60.00 | 60.00 | 53.63 | 60.00 |
|       | HFD+Jlus66 | 50.80              | 37.76 | 60.00 | 60.00 | 60.00 | 60.00 | 60.00 | 58.04 | 46.36 | 59.96 | 47.15 | 54.55 |
| Day2  | Control    | 48.84              | 25.81 | 39.71 | 42.78 | 33.34 | 25.31 | 23.95 | 40.04 | 26.99 | 54.16 | 34.87 | 17.14 |
|       | HFD        | 60.00              | 60.00 | 60.00 | 56.29 | 60.00 | 60.00 | 56.63 | 60.00 | 43.48 | 46.85 | 60.00 | 45.74 |
|       | HFD+Jlus66 | 60.00              | 38.42 | 34.09 | 35.53 | 35.50 | 38.27 | 46.70 | 60.00 | 32.64 | 54.21 | 47.33 | 43.88 |
| Day3  | Control    | 11.28              | 28.08 | 33.73 | 30.21 | 41.88 | 45.00 | 40.48 | 31.18 | 26.29 | 42.70 | 24.36 | 46.40 |
|       | HFD        | 46.53              | 55.59 | 60.00 | 46.71 | 60.00 | 60.00 | 60.00 | 48.34 | 47.01 | 60.00 | 60.00 | 35.54 |
|       | HFD+Jlus66 | 44.54              | 34.30 | 19.17 | 33.28 | 39.87 | 45.53 | 44.44 | 49.99 | 58.39 | 55.00 | 46.38 | 42.80 |
| Day4  | Control    | 12.13              | 30.00 | 26.44 | 22.55 | 38.14 | 21.85 | 42.91 | 25.46 | 36.48 | 39.75 | 38.47 | 35.19 |
|       | HFD        | 60.00              | 57.59 | 36.68 | 60.00 | 60.00 | 60.00 | 60.00 | 60.00 | 60.00 | 59.98 | 60.00 | 60.00 |
|       | HFD+Jlus66 | 39.56              | 33.45 | 25.84 | 38.91 | 35.59 | 36.51 | 40.89 | 50.02 | 57.61 | 54.99 | 47.60 | 41.91 |
| Day5  | Control    | 35.61              | 33.34 | 29.58 | 36.31 | 11.69 | 39.54 | 29.67 | 34.88 | 30.00 | 31.48 | 37.64 | 25.70 |
|       | HFD        | 60.00              | 60.00 | 60.00 | 51.89 | 60.00 | 60.00 | 47.07 | 58.57 | 42.91 | 45.78 | 60.00 | 60.00 |
|       | HFD+Jlus66 | 43.45              | 35.28 | 18.27 | 34.32 | 39.87 | 43.35 | 42.29 | 47.59 | 53.45 | 55.06 | 46.35 | 41.75 |

| Control | The proportion of distance in the target quadrant (%) |            | Time spent in the target quadrant (s) |       |            | Number of platform crossings |      |            |
|---------|-------------------------------------------------------|------------|---------------------------------------|-------|------------|------------------------------|------|------------|
|         | HFD                                                   | HFD+Jlus66 | Control                               | HFD   | HFD+Jlus66 | Control                      | HFD  | HFD+Jlus66 |
| 41.00   | 25.00                                                 | 42.00      | 14.17                                 | 6.68  | 19.68      | 1.00                         | 1.00 | 3.00       |
| 43.00   | 24.00                                                 | 46.00      | 19.30                                 | 13.22 | 15.49      | 2.00                         | 1.00 | 2.00       |
| 45.00   | 23.00                                                 | 45.00      | 13.49                                 | 0.00  | 16.93      | 2.00                         | 0.00 | 2.00       |
| 48.00   | 28.00                                                 | 47.00      | 16.55                                 | 3.73  | 9.99       | 3.00                         | 1.00 | 3.00       |
| 45.00   | 26.00                                                 | 49.00      | 24.99                                 | 0.00  | 23.72      | 2.00                         | 0.00 | 2.00       |
| 40.00   | 27.00                                                 | 46.00      | 14.25                                 | 10.54 | 9.39       | 3.00                         | 1.00 | 5.00       |
| 45.00   | 19.00                                                 | 42.00      | 26.69                                 | 0.00  | 2.43       | 3.00                         | 2.00 | 4.00       |
| 45.00   | 21.00                                                 | 42.00      | 10.10                                 | 4.86  | 23.06      | 2.00                         | 1.00 | 2.00       |
| 46.00   | 28.00                                                 | 41.00      | 12.49                                 | 9.70  | 19.65      | 5.00                         | 0.00 | 3.00       |
| 42.00   | 21.00                                                 | 48.00      | 21.10                                 | 4.10  | 17.52      | 4.00                         | 2.00 | 2.00       |
| 49.00   | 25.00                                                 | 39.00      | 13.56                                 | 13.14 | 10.70      | 5.00                         | 1.00 | 2.00       |
| 43.00   | 27.00                                                 | 44.27      | 15.83                                 | 1.34  | 15.32      | 5.00                         | 0.00 | 3.00       |

mRNA levels (Density relative to GAPDH)

|               | Control |      |      | HFD  |      |      | HFD+Jlus66 |      |      |
|---------------|---------|------|------|------|------|------|------------|------|------|
| <i>Bdnf</i>   | 0.94    | 1.07 | 1.00 | 0.55 | 0.59 | 0.61 | 0.91       | 0.93 | 1.10 |
| <i>Ngf</i>    | 1.03    | 1.03 | 0.95 | 0.50 | 0.46 | 0.41 | 0.92       | 0.88 | 1.18 |
| <i>Nt3</i>    | 1.18    | 0.92 | 0.92 | 0.49 | 0.20 | 0.45 | 1.30       | 1.13 | 1.55 |
| <i>Nt4</i>    | 1.10    | 1.03 | 0.89 | 0.46 | 0.39 | 0.42 | 1.57       | 1.68 | 2.44 |
| <i>Psd95</i>  | 1.02    | 0.96 | 1.02 | 0.85 | 0.80 | 0.82 | 2.46       | 1.54 | 2.14 |
| <i>Snap25</i> | 0.94    | 1.06 | 1.00 | 0.51 | 0.45 | 0.38 | 1.62       | 1.64 | 1.73 |
| <i>Inos</i>   | 0.99    | 0.91 | 1.11 | 1.39 | 1.41 | 1.37 | 0.72       | 0.58 | 0.57 |
| <i>Cox-2</i>  | 1.11    | 1.10 | 0.82 | 1.14 | 1.36 | 1.67 | 0.53       | 0.52 | 0.70 |
| <i>Il-6</i>   | 1.07    | 1.07 | 0.87 | 1.73 | 1.77 | 1.77 | 1.22       | 1.24 | 1.10 |

protein expression (Density relative to Control)

|                                 | Control |      |      | HFD  |      |      | HFD+Jlus66 |      |      |
|---------------------------------|---------|------|------|------|------|------|------------|------|------|
| BDNF/ $\beta$ -actin            | 1.08    | 1.06 | 1.23 | 0.93 | 0.97 | 0.82 | 1.25       | 1.21 | 1.25 |
| PSD95/ $\beta$ -actin           | 1.30    | 0.98 | 0.92 | 0.51 | 0.50 | 0.53 | 0.94       | 0.91 | 0.99 |
| SNAP25/ $\beta$ -actin          | 0.91    | 0.83 | 0.82 | 0.73 | 0.43 | 0.44 | 1.85       | 1.29 | 1.79 |
| p-IRS-1 S <sup>307</sup> /IRS-1 | 0.85    | 0.73 | 0.87 | 1.59 | 1.56 | 1.69 | 0.81       | 0.69 | 0.75 |
| p-IRS-1 Y <sup>612</sup> /IRS-1 | 1.02    | 1.02 | 1.09 | 0.35 | 0.37 | 0.33 | 1.30       | 1.20 | 1.31 |
| p-GSK3 $\beta$ /GSK3 $\beta$    | 1.23    | 1.21 | 1.23 | 0.48 | 0.41 | 0.43 | 1.24       | 1.22 | 1.22 |
| p-AKT/AKT                       | 1.11    | 1.20 | 1.20 | 0.65 | 0.69 | 0.50 | 1.23       | 1.22 | 1.19 |
| Glut4/ $\beta$ -actin           | 1.39    | 1.39 | 1.41 | 0.42 | 0.43 | 0.43 | 1.37       | 1.38 | 1.34 |
| PTP1B/ $\beta$ -actin           | 1.01    | 1.01 | 1.09 | 1.96 | 2.71 | 2.92 | 1.21       | 1.21 | 1.34 |
| p-JNK/JNK                       | 0.97    | 0.99 | 0.98 | 1.29 | 1.52 | 1.87 | 0.88       | 0.80 | 0.96 |
| p-p38/p38                       | 0.75    | 0.84 | 1.03 | 1.69 | 1.67 | 1.65 | 1.15       | 1.03 | 1.01 |

AKT

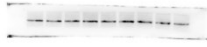

RONF

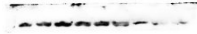

GLUT4

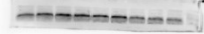

IRS-1

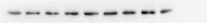

JNK

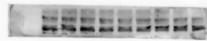

GSK-3 $\beta$

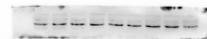

p-AKT

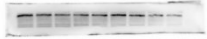

p-IRS-1 Y612

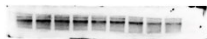

p-IRS-S307

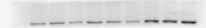

p-GSK-3 $\beta$

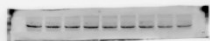

p-JNK

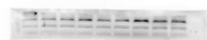

p38

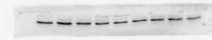

p-p38

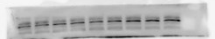

PSD95

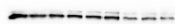

PTP1B

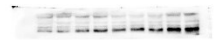

SNAP25

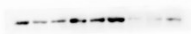

$\beta$ -actin

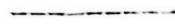

$\beta$ -tubulin

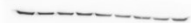

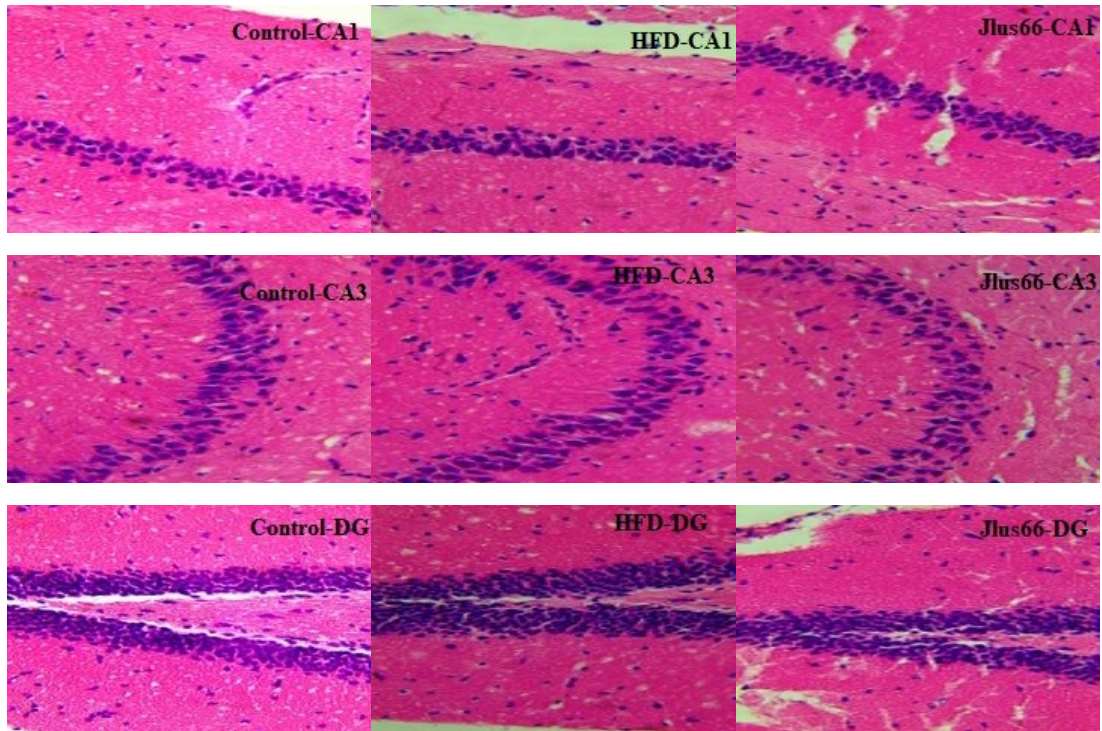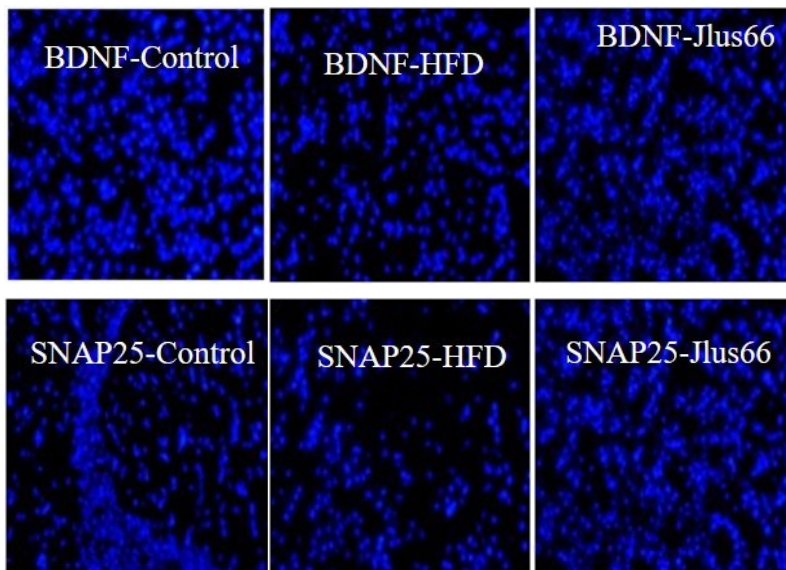

Supplement: d1fo01320c1.pdf [file d1fo01320c1.pdf]
